# Supplementary material for: Single-Cell Analysis Reveals Fibroblast Clusters Linked to Immunotherapy Resistance in Cancer
Source: Oxford University Press journal article supplement (doi:10.1158/2159-8290.cd-19-1384), 2020-05-20
Supplement: 21598290cd191384-sup-233070_2_supp_6285149_qn0t7s.xlsx [file 21598290cd191384-sup-233070_2_supp_6285149_qn0t7s.xlsx]

## Sheet: Feuil1
Data S1. Transcriptomic profiles of the 8 CAF-S1 clusters
Clusters	Category	Term	Description	LogP	Log(q-value)	InTerm_InList	Symbols
Cluster 0 ecm-myCAF	GO Biological Processes	GO:0030198	extracellular matrix organization	-48.2838	-44.2138	48/370	AEBP1,ANXA2,BGN,BMP1,SERPINH1,COL1A1,COL1A2,COL3A1,COL5A1,COL5A2,COL6A1,COL6A2,COL6A3,COL8A1,COL10A1,COL11A1,COL12A1,COL16A1,COMP,VCAN,CCN2,CTSK,FAP,FBN1,FN1,CCN1,ITGB1,ITGB5,LOX,LOXL1,LOXL2,LUM,MATN3,MFAP2,MMP2,MMP11,MMP14,HTRA1,SFRP2,SPARC,COL14A1,ADAM12,MMP23B,P3H4,POSTN,SULF1,SULF2,CREB3L1,P4HB,SDC1,ACTN1,CTSB,PPIB,ASPN,P3H1,P4HA3,ACTG1,ACTN4,CAPZB,CFL1,FLNA,MARCKS,PFN1,S100A10,TPM1,TPM2,TPM4…
	Canonical Pathways	M5884	NABA CORE MATRISOME	-33.0065	-29.291	34/275	AEBP1,BGN,COL1A1,COL1A2,COL3A1,COL5A1,COL5A2,COL6A1,COL6A2,COL6A3,COL8A1,COL10A1,COL11A1,COL12A1,COL16A1,COMP,VCAN,CCN2,FBN1,FN1,CCN1,LUM,MATN3,MFAP2,SPARC,THBS2,COL14A1,CILP,SPON1,POSTN,MXRA5,ASPN,FNDC1,CTHRC1
	Reactome Gene Sets	R-HSA-1474290	Collagen formation	-31.7992	-28.1806	24/90	BMP1,SERPINH1,COL1A1,COL1A2,COL3A1,COL5A1,COL5A2,COL6A1,COL6A2,COL6A3,COL8A1,COL10A1,COL11A1,COL12A1,COL16A1,CTSB,LOX,LOXL1,LOXL2,P4HB,PPIB,COL14A1,P3H1,P4HA3,CTSK,MMP2,MMP11,MMP14,FBN1,FN1,HTRA1,SDC1,BGN,COMP,VCAN,ITGB1,ITGB5,LUM,MATN3,SPARC,ASPN,MDK,THBS2,ACTN1,ACTB,ACTG1,ACTN4,FLNA,MYLK,MYL9,MYL12A,ADAM12,CILP,NRP2,CFL1,CCN2,GJA1,GJB2,PTK7,CREB3L1,PKM,RAB31
	GO Biological Processes	GO:0001501	skeletal system development	-27.2195	-23.747	37/518	ANXA2,BMP1,RUNX2,SERPINH1,CDH11,COL1A1,COL1A2,COL3A1,COL5A2,COL6A1,COL6A2,COL6A3,COL10A1,COL11A1,COL12A1,COMP,VCAN,CCN2,CTSK,FBN1,GJA1,CCN1,LOX,LOXL2,LUM,MATN3,MDK,MMP2,MMP14,PPIB,SFRP2,SPARC,COL14A1,LRRC17,SULF1,SULF2,P3H1,ACTA2,COL5A1,FN1,ITGB1,PKM,PTK7,NRP2,POSTN,TNFRSF12A
	GO Biological Processes	GO:0009611	response to wounding	-19.9261	-16.8501	34/682	ACTB,ACTG1,ACTN1,ANXA2,ARF4,CAPZB,COL1A1,COL1A2,COL3A1,COL5A1,COMP,CCN2,FAP,FLNA,FN1,GJA1,CCN1,INHBA,LGALS1,LOX,MDK,MYH9,MYLK,PKM,PTK7,SDC1,SPARC,TPM1,NREP,MYL9,MYL12A,POSTN,TNFRSF12A,SULF2,CD99
Cluster 1 Detox-iCAF	GO Biological Processes	GO:0098754	detoxification	-10.0198	-6.30434	10/131	APOE,GPX3,MGST1,MT1M,MT1X,MT2A,SOD2,SOD3,FBLN5,CYGB,ANXA1,CDKN1A,GSN,IL6,ADIRF,CYB5A,SERPINF1,SELENOP,PDK4,PTX3,CEBPB
	GO Biological Processes	GO:0040008	regulation of growth	-9.89721	-6.27863	18/682	APOE,CDKN1A,FHL1,GAS6,GPC3,IGFBP4,MT1M,MT1X,MT2A,CXCL12,SELENOP,SFRP1,SLIT3,TGFBR3,SOCS3,GDF15,FBLN5,PI16,ADM,ANXA1,FGF7,GSN,LEPR,PTX3,SERPINF1,ERRFI1,ADAMTS1
	KEGG Pathway	hsa04657	IL-17 signaling pathway	-4.49768	-2.26825	5/93	CEBPB,CXCL2,CXCL3,IL6,CCL2
	GO Biological Processes	GO:0002263	cell activation involved in immune response	-2.73416	-0.978914	9/713	ANXA1,C3,CD44,CST3,CFD,GSN,IL6,MGST1,PTX3
	Reactome Gene Sets	R-HSA-381426	Regulation of Insulin-like Growth Factor (IGF) transport and uptake by Insulin-like Growth Factor Bi	-8.83534	-5.47204	9/125	APOE,C3,CST3,GAS6,GPC3,IGFBP4,IGFBP6,IL6,CHRDL1,ZBTB16,SOCS3,PTX3,CCL2,ANXA1,GSN,LEPR,SRPX,APOC1,NFIA,FXYD1
Cluster 2 IL-iCAF	GO Biological Processes	GO:0009636	response to toxic substance	-14.6195	-10.302	25/525	APOE,RHOB,CDKN1A,EPHX1,FOS,GSN,IL6,JUN,MT1A,MT1E,MT1M,MT1X,MT2A,NR4A2,PTGS2,SOD2,SOD3,VCAM1,KLF4,FBLN5,TXNIP,ADIRF,KDM6B,PDGFD,CYGB,CEBPA,ID2,IGFBP2,JUNB,SELENOP,EIF4A3,MYC,SCARA5,C7,CKB,DDIT3,EDNRB,PDK4,CCL8,CXCL12,TAC1
	GO Biological Processes	GO:0070848	response to growth factor	-13.8717	-10.0313	28/739	ZFP36L2,CD44,FGF7,VEGFD,FOS,GPC3,NR4A1,HSPA1A,ID1,JUN,MYC,PGF,CCL2,TAC1,UBC,VCAM1,ZFP36,KLF4,IER2,EIF4A3,TOB1,SPRY1,SPRY2,CITED2,ERRFI1,DDIT4,RGMA,PDGFD
	GO Biological Processes	GO:0045444	fat cell differentiation	-13.2616	-9.64298	17/224	ZFP36L2,KLF5,CEBPA,CEBPB,CEBPD,DDIT3,EGR2,NR4A1,ID2,IL6,NR4A2,PTGS2,ZFP36,ZBTB16,KLF4,ADIRF,PID1,GPC3,HSPE1,ID1,JUNB,SNAI1,TAC1,TOB1,ANGPTL4,CDKN1A,MYC,NDRG2,HSPA8,REL,JUN,DLK1
	Canonical Pathways	M183	PID IL6 7 PATHWAY	-12.5722	-9.07928	10/47	A2M,CEBPB,CEBPD,FOS,IL6,IRF1,JUN,JUNB,MYC,SOCS3,CXCL1,CXCL2,NFKBIA,PTGS2,CCL2,VCAM1,CDKN1A,HSPA8,CD44,CEBPA,HSPA1A,MT2A,CCL8,CXCL12,SOD2,UBC,EDNRB,TAC1,TFPI,ZFP36,ATF3,DDIT3,FGF7,TXNIP,VEGFD,GPC3,NAMPT
	Reactome Gene Sets	R-HSA-8953897	Cellular responses to external stimuli	-10.8679	-7.59174	21/525	CDKN1A,CEBPB,FOS,HSPA1A,HSPA6,HSPA8,DNAJB1,ID1,IL6,JUN,MT1A,MT1E,MT1M,MT1X,MT2A,SOD2,SOD3,UBC,CITED2,TUBB4B,KDM6B,ATF3,DDIT3,ZFP36L2,PDGFD,GPC3,TOB1,RGMA
	GO Biological Processes	GO:0006979	response to oxidative stress	-9.2993	-6.21221	18/454	APOD,APOE,RHOB,FOS,HSPA1A,IL6,JUN,NR4A2,PTGS2,SELENOP,SOD2,SOD3,KLF4,FBLN5,TXNIP,KDM6B,PDGFD,CYGB,ADIRF,ID1,MT2A,MYC,ERRFI1,DDIT4,GSN,VCAM1
Cluster 3 TGFb-myCAF	Canonical Pathways	M5884	NABA CORE MATRISOME	-21.9152	-17.8987	21/275	BGN,COL3A1,COL4A1,COL4A2,COL6A1,COL6A2,COL6A3,COL10A1,COMP,VCAN,IGFBP7,MFAP2,MGP,SPARC,THBS4,TNFAIP6,SPARCL1,CILP,POSTN,TNN,COL18A1
	GO Biological Processes	GO:0001944	vasculature development	-11.6054	-8.40176	20/793	APOE,RUNX1,COL3A1,COL4A1,COL4A2,COMP,EDNRA,HSPB1,ID1,LOXL1,LOXL2,NOTCH3,PTK7,SPARC,TGFB1,THBS4,THY1,RAMP1,TMEM204,COL18A1,ARHGDIB,TIMP1
	GO Biological Processes	GO:0001503	ossification	-11.1236	-7.9822	15/399	COL6A1,COMP,VCAN,EGR2,ID1,ID3,ID4,MGP,CLEC11A,SPARC,TGFB1,TGFB3,PDLIM7,LRRC17,TNN,APOE,RUNX1,COL3A1,INHBA,MMP11,NOTCH3,THY1,CXCL14,POSTN,HES4,HOPX,PTK7,NREP,COL4A1
	KEGG Pathway	hsa04350	TGF-beta signaling pathway	-6.31619	-3.73901	6/84	ID1,ID3,ID4,INHBA,TGFB1,TGFB3
	GO Biological Processes	GO:0071363	cellular response to growth factor stimulus	-9.52158	-6.54647	17/709	COL3A1,COL4A2,COMP,GPC1,HSPB1,ID1,SPARC,TGFB1,TGFB3,CILP,NREP,POSTN,FSTL1,PMEPA1,RASL11B,TMEM204,HTRA3,INHBA
Cluster 4 wound-myCAF	GO Biological Processes	GO:0030199	collagen fibril organization	-18.1198	-14.5012	12/54	AEBP1,COL1A1,COL1A2,COL3A1,COL11A1,COL12A1,COMP,DPT,LOX,LUM,SFRP2,COL14A1
	GO Biological Processes	GO:0042060	wound healing	-11.7234	-8.58195	18/567	ANXA1,CAV1,CD9,COL1A1,COL1A2,COL3A1,COMP,DCN,FBLN1,GAS6,IGF1,CCN1,LOX,CCN3,PTN,SPARC,THBS1,SMOC2
	GO Biological Processes	GO:0001503	ossification	-16.8049	-13.3324	20/399	COL1A1,COL1A2,COL11A1,COMP,CCN2,ID4,IGF1,IGF2,IGFBP3,CCN1,LOX,OMD,PTN,SFRP2,SPARC,DHRS3,ASPN,CTHRC1,OSR2,TMEM119,SEMA3C,COL3A1,COL12A1,COL14A1,RARRES2,CITED2,COL8A1
	GO Biological Processes	GO:0031214	biomineral tissue development	-12.1074	-8.90377	12/163	COL1A1,COL1A2,COMP,GAS6,IGF1,CCN1,LOX,OMD,PTN,ASPN,OSR2,TMEM119,SFRP2,DHRS3,CTHRC1,ANXA1,CAV1,SEMA3C
	Reactome Gene Sets	R-HSA-2022090	Assembly of collagen fibrils and other multimeric structures	-11.9573	-8.78585	9/61	COL1A1,COL1A2,COL3A1,COL8A1,COL11A1,COL12A1,LOX,PCOLCE,COL14A1,IGF1,COMP,DCN,LUM,SPARC,ASPN,THBS1,THBS2,CAV1,CD9,FBLN1,GAS6,CCN2,SERPINF1,PTN,MMP23B,VSIR,C1QTNF3,OSR2,C3
Cluster 5 IFNg-iCAF	GO Biological Processes	GO:0019221	cytokine-mediated signaling pathway	-28.3041	-23.9866	39/798	BIRC3,B2M,CD40,CD44,CD74,CSF1,GBP1,GBP2,CXCL1,CXCL2,CXCL3,HLA-A,HLA-B,HLA-C,HSPA1A,ICAM1,CXCL10,IRF1,CXCL9,NFKBIA,PSMB9,PSME2,CCL2,CCL5,CCL8,CCL19,CXCL11,SOD2,STAT1,TIMP1,TNFAIP3,TNFRSF4,UGCG,VCAM1,IL32,CXCL13,TNFSF13B,PARP14,IL34,ZFP36L1,ZFP36L2,UBD,GBP4
	GO Biological Processes	GO:0034341	response to interferon-gamma	-17.4801	-13.6397	18/199	B2M,CD44,GBP1,GBP2,HLA-A,HLA-B,HLA-C,ICAM1,IRF1,CCL2,CCL5,CCL8,CCL19,STAT1,VCAM1,UBD,PARP14,GBP4,C1R,C2,C3,C7,CD40,CD74,CTSH,RELB,TNFAIP3,CXCL13,TNFSF13B,CTSS,PSMB9,PSME2,TAP1,HSPA1A,BIRC3,TNFRSF4,COLEC12,NFKBIA,APOL1,TNFSF10,F2R
	KEGG Pathway	hsa04060	Cytokine-cytokine receptor interaction	-12.6734	-9.54494	16/270	CD40,CSF1,CXCL1,CXCL2,CXCL3,CXCL10,CXCL9,CCL2,CCL5,CCL8,CCL19,CXCL11,TNFRSF4,TNFSF10,CXCL13,TNFSF13B
	GO Biological Processes	GO:0070371	ERK1 and ERK2 cascade	-12.632	-9.54494	17/322	APOE,ZFP36L1,ZFP36L2,CD44,CD74,CTSH,F2R,GBP1,ICAM1,CCL2,CCL5,CCL8,CCL19,KLF4,TNIP1,EMILIN1,NDRG2,CSF1,CYP1B1,IRF1,NINJ1,SNAI2,VCAM1,CXCL13,TNFSF13B,ABI3BP,EGFLAM,CXCL10,PGF,B2M,RELB,TNFRSF4,MAFB,CD40,F10,SOD2,PLK2,TNFAIP3,ITM2A,IL34,C3,NFKBIA,HSPA1A,HSPE1,PSME2,RGS16,TNFSF10,PLAAT4,TCIM,ARRDC3,WARS1
	KEGG Pathway	hsa04064	NF-kappa B signaling pathway	-10.5388	-7.68368	10/95	BIRC3,CD40,CXCL2,ICAM1,NFKBIA,RELB,CCL19,TNFAIP3,VCAM1,TNFSF13B,IRF1,UBD,CST3,ITM2A
Cluster 6 IFNab-myCAF	Reactome Gene Sets	R-HSA-909733	Interferon alpha/beta signaling	-37.5086	-33.191	21/69	BST2,IFI6,HLA-B,HLA-C,IFI27,IFI35,IFIT2,IFIT1,IFIT3,IRF7,MX1,MX2,OAS1,OAS3,STAT1,IFITM1,ISG15,IFITM3,USP18,XAF1,RSAD2,GBP1,UBE2L6,DDX58,CXCL10,PLSCR1,HTRA1,CCL11,IFI44,IFI44L,COL1A2,FN1,MMP2,PSMB9,PSME2,PARP14
	Reactome Gene Sets	R-HSA-1169410	Antiviral mechanism by IFN-stimulated genes	-13.5891	-10.5268	10/80	IFIT1,MX1,MX2,OAS1,OAS3,STAT1,UBE2L6,ISG15,USP18,DDX58,IRF7,CXCL10,BST2,FN1,GBP1,PARP14,IFI6
	Reactome Gene Sets	R-HSA-198933	Immunoregulatory interactions between a Lymphoid and a non-Lymphoid cell	-6.99603	-4.3317	7/132	COL1A1,COL1A2,COL3A1,HLA-B,HLA-C,CD99,IFITM1,PSMB9,PSME2,UBE2L6,HERC6,FBXO32,BST2,DDX58,RSAD2,VCAN,IRF7,TNFSF10
	GO Biological Processes	GO:0001568	blood vessel development	-6.67829	-4.07675	13/762	COL1A1,COL1A2,COL3A1,TYMP,FN1,CXCL10,MDK,MMP2,MMP14,CCL11,SFRP2,SPARC,STAT1,POSTN,CD99,HTRA1,MMP11,TNFSF10,CTHRC1,ISG15
	GO Biological Processes	GO:0001817	regulation of cytokine production	-6.07836	-3.5167	12/720	BST2,FN1,GBP1,IRF7,LUM,MDK,STAT1,UBE2L6,ISG15,POSTN,DDX58,RSAD2,COL1A1,MMP14,COL3A1,CCL11,SPARC,SFRP2,IFI27
Cluster 7 acto-myCAF	Reactome Gene Sets	R-HSA-1474244	Extracellular matrix organization	-8.77461	-4.45707	11/301	BGN,COMP,CTSB,MATN3,MMP7,P4HB,PPIB,SPARC,TGFB3,MFAP5,SH3PXD2A,CST3,SFRP2,MMP23B,IGFBP7
	GO Biological Processes	GO:0030029	actin filament-based process	-6.39289	-2.77432	13/760	CTTN,MDK,MYH9,MYL6,RAB13,S100A10,TGFB3,TMSB4X,TPM1,TMSB10,PDLIM7,ARPC1B,PALLD,COMP,CRYAB,CST3,SFRP2,MFAP5,THY1
	CORUM	CORUM:486	WIP-WASp-actin-myosin-IIa complex	-6.27886	-2.74252	3/6	ACTA2,MYH9,MYL6,CTTN,MYL9,TPM1,COMP,CRYAB,RAB13,ARPC1B,TMSB4X,CNTN1,PDLIM7
	Reactome Gene Sets	R-HSA-8957275	Post-translational protein phosphorylation	-6.03296	-2.71541	6/108	CST3,IGFBP7,LGALS1,MATN3,P4HB,GOLM1,PPIB,RAB13,CTSB,MMP7,PPIC,IFI27,CRYAB
	GO Biological Processes	GO:0060348	bone development	-5.3742	-2.20279	7/217	COMP,MATN3,PPIB,SFRP2,SFRP4,SPARC,TGFB3,MDK,PDLIM7,S100A4,ACTA2,CD9,CTTN,MYH9,THY1
