# Supplementary material for: Single-Cell Analysis Reveals Fibroblast Clusters Linked to Immunotherapy Resistance in Cancer
Source: Oxford University Press journal article supplement (doi:10.1158/2159-8290.cd-19-1384), 2020-05-20
Supplement: 21598290cd191384-sup-233070_2_supp_6285150_q20t7s.xlsx [file 21598290cd191384-sup-233070_2_supp_6285150_q20t7s.xlsx]

## Sheet: Tab1
Data S2: List of gene that compose CAF-S1 cluster-specific signatures
		BC Seurat V3 differential analysis			Percentage of positive cells in tumor (%)
Gene symbol	Cluster	p-value	avg_logFC	Adjusted p-value	NSCLC	Melanoma	HNSCC
ASPN	0	0	1.16306	0	0.0671411	1.11376	1.98646
COL3A1	0	0	1.09168	0	1.26225	8.035	1.21896
THY1	0	0	0.669157	0	0.107426	1.11376	4.8307
SFRP2	0	0	0.652191	0	0.22828	1.59109	0.857788
COL10A1	0	0	0.651147	0	0.0134282	1.82975	1.62528
COL6A3	0	0	0.642612	0	0.429703	1.82975	0.812641
LRRC17	0	0	0.631368	0	0.0402847	0.875099	0.767494
CILP	0	0	0.625678	0	0	0.397772	0.496614
GRP	0	0	0.56698	0	0	0.0795545	0.0902935
ITGBL1	0	0	0.500748	0	1.07426	0.795545	1.26411
COL8A1	0	0	0.498856	0	0.241708	5.48926	3.4763
COL14A1	0	0	0.462778	0	0.0134282	0.477327	0.541761
ADAM12	0	0	0.435053	0	0.134282	2.94352	5.05643
OLFML2B	0	0	0.416994	0	0.0268565	3.02307	1.48984
ELN	0	0	0.416167	0	0.402847	0.397772	0.406321
PLPP4	0	0	0.415361	0	0	NA	NA
CREB3L1	0	0	0.415189	0	0.107426	0.0795545	0.27088
FBN1	0	0	0.404621	0	0.0537129	2.86396	2.34763
LOXL1	0	0	0.369654	0	0.590842	0.636436	7.76524
MATN3	0	0	0.368975	0	0.0671411	0.477327	1.58014
LRRC15	0	0	0.367342	0	0	0.159109	0.361174
COMP	0	0	0.365934	0	0.0268565	0.318218	0.451467
ISLR	0	0	0.350219	0	0.0671411	1.82975	0.902935
P3H1	0	0	0.34716	0	1.16826	NA	NA
COL11A1	0	0	0.333138	0	0.0134282	1.98886	0.180587
SEPT11	0	0	0.316919	0	NA	NA	NA
NBL1	0	0	0.315237	0	7.76151	4.21639	3.70203
SPON1	0	0	0.314634	0	0.107426	2.6253	1.62528
SULF1	0	0	0.310879	0	0.0805694	2.06842	8.80361
FNDC1	0	0	0.298845	0	0.0134282	0.159109	0.27088
CNN1	0	0	0.283027	0	0.0402847	0	0.993228
MIAT	0	0	0.283013	0	0.738552	1.98886	8.93905
MMP23B	0	0	0.28225	0	0.0268565	0.238663	0.27088
CPXM1	0	0	0.277609	0	0.0268565	4.45505	3.70203
FIBIN	0	0	0.271521	0	0.0537129	0.636436	3.25056
P4HA3	0	0	0.267065	0	0.161139	1.35243	1.3544
GXYLT2	0	0	0.263629	0	0.0134282	2.22753	1.12867
CILP2	0	0	0.26317	0	0.0268565	1.90931	0.406321
P3H4	0	0	0.254392	0	1.43682	NA	NA
CCDC80	0	1.15e-269	0.251382	2.3e-266	0.37599	8.43278	7.90068
ADH1B	1	0	0.947	0	0.0134282	0.159109	0.27088
C7	1	0	0.503623	0	0.0134282	2.22753	0.225734
CXCL12	1	0	0.492674	0	0.0805694	0.556881	5.95937
TNXB	1	0	0.462257	0	0.0402847	0.397772	0.722348
RSPO3	1	0	0.440299	0	4.72674	0.159109	0.767494
DCN	1	0	0.378042	0	1.82624	2.06842	8.80361
C16orf89	1	0	0.361353	0	1.06083	3.97772	0.0451467
GDF10	1	0	0.286115	0	0.0134282	0.318218	0.0451467
PAMR1	1	0	0.263157	0	0.0268565	0.318218	6.36569
FXYD1	1	5.38e-294	0.399075	1.08e-290	0.161139	3.73906	0.13544
ZBTB16	1	1.36e-292	0.311559	2.73e-289	0.174567	0.71599	3.43115
SLIT3	1	1.58e-291	0.41615	3.17e-288	0	1.90931	5.19187
HSPB6	1	6.79e-272	0.299383	1.36e-268	0.0402847	4.69372	0.0902935
IL6	1	7.22e-229	0.498695	1.44e-225	0.0805694	0.875099	7.81038
FBLN5	1	5.98e-194	0.362665	1.2e-190	0.483416	7.23946	3.11512
OGN	1	6.01e-182	0.366959	1.2e-178	0	1.51154	0.948081
PLA2G2A	1	8.07e-181	0.401306	1.61e-177	0.0268565	1.82975	0.586907
CHRDL1	1	3.76e-168	0.306646	7.52e-165	0.174567	3.65951	0.361174
CYGB	1	1.11e-151	0.292511	2.21e-148	0.0134282	8.11456	2.7991
FGF7	1	6.86e-143	0.342181	1.37e-139	0.0402847	1.82975	0.27088
PI16	1	8.86e-140	0.464036	1.77e-136	0	0.875099	0.225734
PLAC9	1	2.94e-98	0.292749	5.87e-95	0.0805694	1.19332	0.677201
WISP2	1	6.45e-96	0.382555	1.29e-92	0.187995	3.26173	0.180587
PTX3	1	1e-83	0.307726	2.01e-80	0.0537129	2.38663	0.406321
CCL2	1	3.16e-56	0.251081	6.31e-53	1.20854	1.82975	5.14673
CXCL3	1	8.41e-48	0.319904	1.68e-44	1.0474	2.38663	9.6614
ITM2A	2	0	0.850469	0	1.02055	2.38663	2.43792
CXCL12	2	0	0.762776	0	0.0805694	0.556881	5.95937
FIGF	2	0	0.693008	0	0.0134282	0.556881	1.26411
FXYD1	2	0	0.658516	0	0.161139	3.73906	0.13544
PLPP3	2	0	0.611866	0	1.2354	NA	NA
TNFRSF10D	2	0	0.322354	0	0.939976	0.875099	6.41084
CTB-92J24.3	2	2.82e-291	0.736754	5.64e-288	0.0134282	NA	NA
LAMC3	2	1.93e-251	0.33959	3.87e-248	0.0134282	4.61416	3.88262
C7	2	4.66e-251	0.593062	9.32e-248	0.0134282	2.22753	0.225734
ZBTB16	2	1.12e-247	0.493859	2.25e-244	0.174567	0.71599	3.43115
CAPN6	2	8.62e-238	0.295717	1.72e-234	0	0.159109	1.12867
SCARA5	2	8.02e-236	0.527718	1.6e-232	0.14771	1.27287	0.451467
DLK1	2	3.71e-186	0.650835	7.41e-183	NA	0.238663	0.0902935
MEG3	2	2.77e-185	0.382626	5.54e-182	0.174567	1.82975	9.30023
TAC1	2	1.44e-170	0.628772	2.89e-167	0.389419	0.159109	0.0451467
THUMPD3-AS1	2	2.33e-153	0.553769	4.65e-150	6.25755	NA	NA
GMFG	2	1.11e-99	0.269252	2.21e-96	2.8065	6.76213	0.632054
CYGB	2	3.37e-94	0.345806	6.75e-91	0.0134282	8.11456	2.7991
CCL8	2	1.24e-91	0.760278	2.47e-88	0.0939976	0.159109	0.13544
VCAM1	2	6.04e-85	0.275872	1.21e-81	0.738552	3.73906	4.19865
FMO2	2	5.29e-80	0.278143	1.06e-76	3.19592	0.71599	1.89616
FBLN5	2	5.32e-76	0.359501	1.06e-72	0.483416	7.23946	3.11512
COLEC12	2	3.21e-70	0.333893	6.42e-67	0.0268565	4.13683	0.677201
PDGFD	2	4.06e-62	0.288276	8.12e-59	0.0805694	5.17104	0.586907
GADD45G	2	1.82e-53	0.540766	3.64e-50	5.29072	0.238663	6.09481
SNAI1	2	6.13e-47	0.369723	1.23e-43	0.60427	8.98966	8.75847
LSP1	2	1.95e-45	0.279798	3.91e-42	2.14852	3.02307	9.75169
CCL2	2	4.43e-42	0.710402	8.86e-39	1.20854	1.82975	5.14673
IL6	2	1.51e-37	0.492556	3.02e-34	0.0805694	0.875099	7.81038
PTGS2	2	5.54e-32	0.308285	1.11e-28	5.62643	8.75099	8.84876
NR2F1	2	2.3e-30	0.313372	4.61e-27	0.939976	3.26173	0.0902935
F10	2	5.95e-23	0.266241	1.19e-19	0	0.477327	0.361174
CEBPA	2	8.02e-16	0.270152	1.6e-12	0.37599	0.0795545	6.36569
KDM6B	2	1.55e-08	0.298045	3.1e-05	1.42339	6.60302	8.75847
PID1	2	0.000347449	0.26201	0.694899	0.268565	0.318218	4.42438
CST1	3	0	1.17688	0	0.0671411	1.67064	0.496614
LAMP5	3	0	1.04927	0	0.0268565	0.636436	0.496614
LOXL1	3	0	0.720184	0	0.590842	0.636436	7.76524
EDNRA	3	0	0.541092	0	0.0537129	0.238663	9.61625
TGFB1	3	0	0.444428	0	1.82624	0.556881	3.97291
TGFB3	3	1.63e-301	0.534762	3.25e-298	0.0671411	2.38663	3.43115
TNN	3	1.11e-291	0.356255	2.22e-288	0	0.795545	0.0902935
CST2	3	9.76e-222	0.503295	1.95e-218	0.0134282	5.33015	0.0451467
HES4	3	1.51e-202	0.399257	3.01e-199	8.17779	1.7502	4.33409
COL10A1	3	3.11e-195	0.517006	6.22e-192	0.0134282	1.82975	1.62528
ELN	3	5.42e-194	0.599514	1.08e-190	0.402847	0.397772	0.406321
THBS4	3	2.08e-191	0.477984	4.15e-188	0	1.90931	4.8307
NKD2	3	1.07e-187	0.347705	2.15e-184	0.711696	0.556881	7.76524
OLFM2	3	2.43e-175	0.327685	4.86e-172	0.698268	0.477327	4.46953
COL6A3	3	1.7e-174	0.365095	3.39e-171	0.429703	1.82975	0.812641
LRRC17	3	2.27e-174	0.433303	4.54e-171	0.0402847	0.875099	0.767494
COL3A1	3	5.05e-157	0.414896	1.01e-153	1.26225	8.035	1.21896
THY1	3	4.64e-153	0.406667	9.28e-150	0.107426	1.11376	4.8307
HTRA3	3	1.06e-151	0.468274	2.12e-148	0.0671411	5.96659	3.74718
TMEM204	3	4.3e-127	0.289368	8.59e-124	0.120854	9.14877	2.16704
SEPT11	3	6.47e-123	0.300607	1.29e-119	NA	NA	NA
COMP	3	4.07e-122	0.540909	8.15e-119	0.0268565	0.318218	0.451467
TNFAIP6	3	5.23e-122	0.283413	1.05e-118	0.22828	3.34129	0.902935
ID4	3	5.27e-114	0.305923	1.05e-110	0.22828	6.36436	1.89616
GGT5	3	8.77e-106	0.339299	1.75e-102	0.37599	0.636436	0.632054
INAFM1	3	8.93e-86	0.253223	1.79e-82	1.78595	NA	NA
CILP	3	4.91e-75	0.326058	9.82e-72	0	0.397772	0.496614
OLFML2B	3	1.6e-69	0.273018	3.2e-66	0.0268565	3.02307	1.48984
SFRP4	4	0	1.97086	0	0.0805694	1.35243	0.406321
CCDC80	4	0	1.06805	0	0.37599	8.43278	7.90068
OGN	4	1.19e-284	0.80323	2.38e-281	0	1.51154	0.948081
DCN	4	4.92e-284	0.485654	9.84e-281	1.82624	2.06842	8.80361
PTGER3	4	6.16e-259	0.666506	1.23e-255	0	1.82975	0.27088
SFRP2	4	1.39e-257	0.721428	2.78e-254	0.22828	1.59109	0.857788
PDGFRL	4	9.58e-227	0.602111	1.92e-223	1.65167	3.81862	1.71558
SMOC2	4	3.64e-214	0.662212	7.28e-211	0.0939976	0.318218	6.68172
MMP23B	4	1.22e-177	0.525205	2.43e-174	0.0268565	0.238663	0.27088
CPXM2	4	1.2e-170	0.48988	2.41e-167	0.241708	3.5004	4.51467
COL14A1	4	2.58e-165	0.511391	5.16e-162	0.0134282	0.477327	0.541761
ITGBL1	4	9.74e-163	0.56895	1.95e-159	1.07426	0.795545	1.26411
WISP2	4	4.91e-162	0.731659	9.81e-159	0.187995	3.26173	0.180587
CILP2	4	1.02e-155	0.551818	2.04e-152	0.0268565	1.90931	0.406321
COL8A1	4	1.53e-140	0.572043	3.06e-137	0.241708	5.48926	3.4763
GAS1	4	2.27e-125	0.521414	4.54e-122	0.0671411	2.22753	1.3544
COL3A1	4	5.26e-117	0.514043	1.05e-113	1.26225	8.035	1.21896
OMD	4	5.01e-91	0.412319	1e-87	0	3.97772	2.75395
COL11A1	4	2.68e-90	0.292927	5.37e-87	0.0134282	1.98886	0.180587
CILP	4	1.86e-85	0.448879	3.73e-82	0	0.397772	0.496614
NEXN	4	3.51e-82	0.372876	7.02e-79	0.416275	2.6253	9.11964
ASPN	4	9.95e-75	0.276637	1.99e-71	0.0671411	1.11376	1.98646
RARRES2	4	4.1e-71	0.257662	8.21e-68	2.51108	2.78441	0.677201
FIBIN	4	5.53e-67	0.350539	1.11e-63	0.0537129	0.636436	3.25056
TMEM119	4	2.38e-66	0.354696	4.75e-63	0.0134282	3.5004	0.406321
KERA	4	1.6e-64	0.315123	3.2e-61	0	0.0795545	0.0451467
ID4	4	6.81e-57	0.289044	1.36e-53	0.22828	6.36436	1.89616
GRP	4	1.48e-54	0.361596	2.97e-51	0	0.0795545	0.0902935
COMP	4	2.18e-52	0.478621	4.35e-49	0.0268565	0.318218	0.451467
DPT	4	2.92e-52	0.320876	5.84e-49	0.0805694	0.636436	2.66366
ELN	4	3.24e-52	0.259991	6.48e-49	0.402847	0.397772	0.406321
FBLN2	4	5.47e-44	0.267929	1.09e-40	0.214852	4.05728	8.53273
IGF1	4	6.24e-31	0.255333	1.25e-27	0.0268565	3.42084	1.71558
IGF2	4	3.62e-25	0.275479	7.23e-22	0	0.71599	0.451467
CCL19	5	8.29e-244	3.04531	1.66e-240	0.214852	0.318218	0.406321
VCAM1	5	1.43e-242	1.08148	2.87e-239	0.738552	3.73906	4.19865
RBP5	5	1.22e-215	0.87747	2.44e-212	0.0402847	1.51154	1.30926
CYP1B1	5	1.32e-154	0.803926	2.63e-151	1.02055	0.795545	3.386
C7	5	2.59e-135	0.611676	5.19e-132	0.0134282	2.22753	0.225734
TNFRSF4	5	1.01e-130	0.450554	2.01e-127	0.402847	5.48926	0.13544
CXCL13	5	1.3e-104	0.57968	2.6e-101	3.27649	1.11376	2.16704
CXCL9	5	2.69e-103	0.889878	5.38e-100	0.550557	0.954654	6.23025
CCL2	5	1.93e-93	0.902147	3.86e-90	1.20854	1.82975	5.14673
IL34	5	1.26e-81	0.372393	2.52e-78	0.174567	3.18218	1.89616
ABI3BP	5	1.18e-77	0.421717	2.36e-74	0.0671411	4.45505	3.06998
CYP7B1	5	3.24e-72	0.366152	6.48e-69	0.201423	9.54654	5.86907
F10	5	1.57e-57	0.324577	3.14e-54	0	0.477327	0.361174
COLEC12	5	2.49e-57	0.267095	4.97e-54	0.0268565	4.13683	0.677201
CXCL10	5	4.93e-53	1.49582	9.86e-50	9.05062	2.06842	9.84199
EMILIN1	5	1.85e-48	0.306413	3.71e-45	0.107426	3.18218	0.361174
GGT5	5	2.46e-47	0.320671	4.92e-44	0.37599	0.636436	0.632054
EGFLAM	5	5.4e-47	0.274702	1.08e-43	0.0939976	5.80748	1.26411
PLXDC1	5	6.15e-46	0.286738	1.23e-42	0.107426	4.45505	5.46275
CXCL11	5	1.09e-37	0.585395	2.18e-34	3.50477	0.556881	8.89391
CCL8	5	9.42e-10	0.431781	1.88e-06	0.0939976	0.159109	0.13544
CXCL3	5	2.46e-05	0.265629	0.0491696	1.0474	2.38663	9.6614

## Sheet: Tab2
Data S2: CAF gene signatures
ecm-myCAF	detox-iCAF	IL-iCAF	TGFβ-myCAF	wound-myCAF	IFNγ-iCAF	CAF-S1	Normal Fibroblast
ASPN	ADH1B	ITM2A	CST1	SFRP4	CCL19	LAMA2	ACACB
COL3A1	C7	CXCL12	LAMP5	CCDC80	VCAM1	SFRP4	ACSM5
THY1	CXCL12	FIGF	LOXL1	OGN	RBP5	PDGFRA	ADAMTS5
SFRP2	TNXB	FXYD1	EDNRA	DCN	CYP1B1	LRRC15	ADRB1
COL10A1	RSPO3	PLPP3	TGFB1	PTGER3	C7	GREM1	AGTR1
COL6A3	DCN	TNFRSF10D	TGFB3	SFRP2	TNFRSF4	SFRP2	AKR1C4
LRRC17	C16orf89	CTB-92J24.3	TNN	PDGFRL	CXCL13	KIAA1462	ANKRD20A4
CILP	GDF10	LAMC3	CST2	SMOC2	CXCL9	DCN	ANKRD31
GRP	PAMR1	C7	HES4	MMP23B	CCL2	CPXM2	AQP7
ITGBL1	FXYD1	ZBTB16	COL10A1	CPXM2	IL34	PTGFR	ARHGAP6
COL8A1	ZBTB16	CAPN6	ELN	COL14A1	ABI3BP	WNT2	ASPA
COL14A1	SLIT3	SCARA5	THBS4	ITGBL1	CYP7B1	ADAMTSL1	ATOH8
ADAM12	HSPB6	DLK1	NKD2	WISP2	F10	FBLN5	ATP1A2
OLFML2B	IL6	MEG3	OLFM2	CILP2	COLEC12	DPP4	ATP8B4
ELN	FBLN5	TAC1	COL6A3	COL8A1	CXCL10	P4HA3	BMP5
PLPP4	OGN	THUMPD3-AS1	LRRC17	GAS1	EMILIN1	CCDC80	C1QTNF7
CREB3L1	PLA2G2A	GMFG	COL3A1	COL3A1	GGT5	PRICKLE1	C4orf32
FBN1	CHRDL1	CYGB	THY1	OMD	EGFLAM	GALNT12	CA3
LOXL1	CYGB	CCL8	HTRA3	COL11A1	PLXDC1	ABI3BP	CAB39L
MATN3	FGF7	VCAM1	TMEM204	CILP	CXCL11	GALNTL2	CADM3
LRRC15	PI16	FMO2	SEPT11	NEXN	CCL8	RSPO3	CCDC69
COMP	PLAC9	FBLN5	COMP	ASPN	CXCL3	LOC100288077	CD14
ISLR	WISP2	COLEC12	TNFAIP6	RARRES2		PODN	CD34
P3H1	PTX3	PDGFD	ID4	FIBIN		CHRDL1	CD36
COL11A1	CCL2	GADD45G	GGT5	TMEM119		CILP	CDH6
SEPT11	CXCL3	SNAI1	INAFM1	KERA		PRDM6	CDHR3
NBL1		LSP1	CILP	ID4		CCL11	CDHR4
SPON1		CCL2	OLFML2B	GRP		CAPN6	CHRDL1
SULF1		IL6		COMP		PDGFRL	CIDEC
FNDC1		PTGS2		DPT		PTGS2	CLEC3B
CNN1		NR2F1		ELN		SEMA3D	COL21A1
MIAT		F10		FBLN2		DPT	COX4I2
MMP23B		CEBPA		IGF1		NOX4	CTSG
CPXM1		KDM6B		IGF2		ZFHX4	CYP21A2
FIBIN		PID1				EPYC	CYP3A5
P4HA3						DCHS1	CYP4B1
GXYLT2						DNM3	CYP4F12
CILP2						COL6A6	CYP4X1
P3H4						CPZ	DACT2
CCDC80						FLRT2	DGAT2
						NEGR1	DGKB
						BMPER	DNASE1L3
						LOC255480	DPY19L2
						CXCL12	EBF2
						HTRA3	EBF3
						DIO2	ECM2
						TNNT3	ESAM
						COL6A3	F10
						KCNK2	FAM162B
						KERA	FAM180B
						COL11A1	FBLN5
						STMN2	FHL5
						SYNDIG1	FNDC5
						ISLR	FRMPD1
						COL10A1	FZD4
						ADH1B	G0S2
						OMD	GDF10
						GAS1	GHR
						PTX3	GPD1
						FLNC	HBA1
						SPON1	HBA2
						CST1	HBB
						CNTN3	HBD
						COMP	HIGD1B
						CD177	HRCT1
						MFAP4	IL33
						LSP1	KANK3
						F13A1	KCNA2
						PLA2G2A	KCNAB1
						GDF10	KLF2
						UST	KRT222
						FHAD1	LIFR
						OGN	LMO3
						LIPG	LRAT
						SORCS2	LRP1B
						FGF7	MLXIPL
						ABCA9	NEGR1
						WISP2	NOVA1
						BEND6	NPR1
						ADH1C	NPY1R
						GRIA3	NTN1
						FAT4	NTN4
						FNDC1	PCOLCE2
						SCARA5	PGM5
						IGFL2	PID1
						KIAA1199	PLIN1
						PI16	PLIN4
						LOC728640	PPARG
						C3orf55	PPP1R1A
						AOX1	PRG2
						CLCN4	PXDNL
						HS3ST3A1	REEP1
						TMEM176B	RET
						CST2	S1PR1
						FBN1	SCARA5
						GXYLT2	SCARF1
						FGL2	SCN4A
						GABRB2	SCN4B
						COL3A1	SDPR
						SLC1A7	SEC14L5
							SEMA6C
							SERINC4
							SGCA
							SH2D1A
							SLC16A12
							SLC19A3
							SLC1A2
							SLC2A4
							SLC7A4
							SLC8A1
							SMOC1
							SPAG17
							SPRR2F
							STEAP4
							TCF7L1
							TEF
							TNMD
							TNNT3
							TNXB
							TPSAB1
							TPSB2
							TRHDE
							VIPR1
							VIT
							VSIG10L
							VWF
							WDR17
							WNT11
							ZDHHC11
							ZNF304
							ZNF839
